# Supplementary material for: Sheng Jing Decoction Can Promote Spermatogenesis and Increase Sperm Motility of the Oligozoospermia Mouse Model
Source: Hindawi journal article supplement (doi:10.1155/2021/3686494), 2021-12-01
Supplement: f1 [file 3686494.f1.pdf]

SUPPLEMENTAL TABLE 1. The information of herbs in Sheng Jing Decoction

| Official name | Local name  | English name                                   | Batch number | Producing area |
|---------------|-------------|------------------------------------------------|--------------|----------------|
| Di Huang      | Di Huang    | <i>Rehmannia glutinosa</i> (Gaertn.) DC.       | 190323-2     | Gansu, China   |
| Huang Qi      | Huang Qi    | <i>Astragalus membranaceus</i> (Fisch.) Bunge  | 190326-2     | Gansu, China   |
| Tai Zi Shen   | Tai Zi Shen | <i>Pseudostellaria heterophylla</i> (Miq.) Pax | 190505-1     | Guizhou, China |
| Xu Duan       | Xu Duan     | <i>Dipsacus acaulis</i> (A.Rich.) Napper       | 190320-1     | Sichuan, China |
| Gou Qi Zi     | Gou Qi      | <i>Lycium arenicolum</i> Miers                 | 190325-1     | Ningxia, China |
| Sha Yuan Zi   | Sha Yuan Zi | <i>Astragalus complanatus</i> Bunge            | 190109-1     | Shanxi, China  |
| Zao Jiao Ci   | Zao Jiao Ci | <i>Gleditsia sinensis</i> Lam.                 | 190304-1     | Jiangsu, China |
